# Supplementary material for: Integrated analysis of hydrothermal flow through pretreatment
Source: PubMed Central journal article supplement (PMC3495837; doi:10.1186/1754-6834-5-49), 2012-07-19

### FT Corn Stover

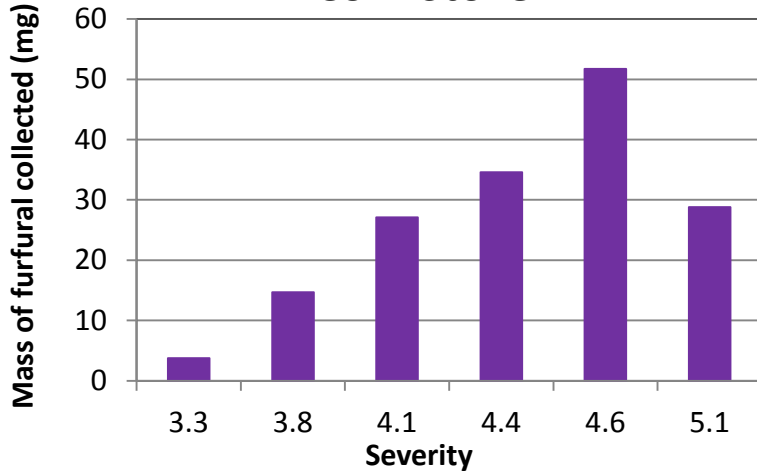

### FT Bagasse

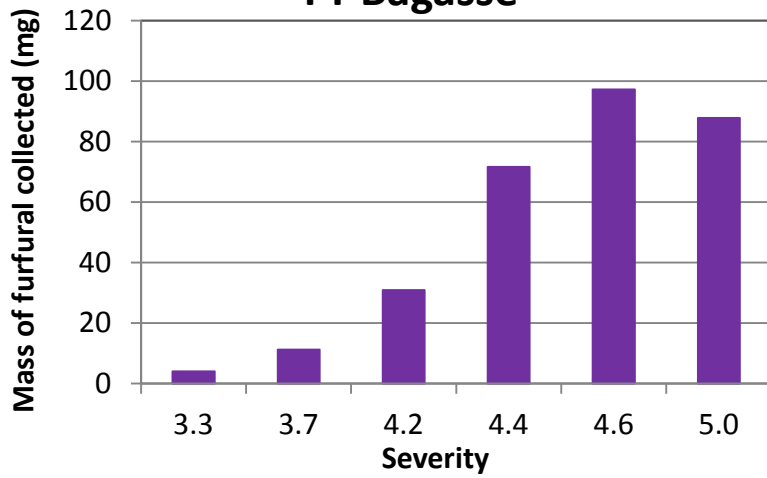

### FT Poplar

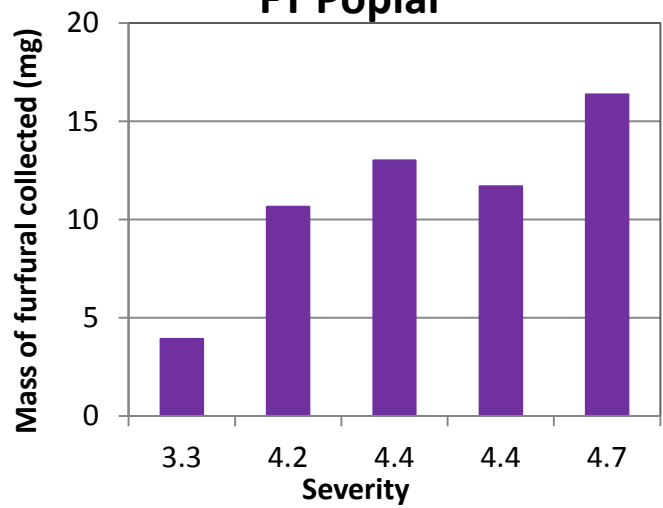

Supplement: 1754-6834-5-49-S1.pdf [file 1754-6834-5-49-S1.pdf]
