# Supplementary material for: Integrated analysis of hydrothermal flow through pretreatment
Source: PubMed Central journal article supplement (PMC3495837; doi:10.1186/1754-6834-5-49), 2012-07-19
Supplement: 1754-6834-5-49-S2.pdf [file 1754-6834-5-49-S2.pdf]

Table S1. Quadratic models for FT pretreatment on poplar at various times and temperatures.

|                                 | <b>Model</b>                                                   | <b>Adjusted R<sup>2</sup></b> | <b>p-value</b> |
|---------------------------------|----------------------------------------------------------------|-------------------------------|----------------|
| <b>Glucan conversion</b>        | $-1,170 + 11.4 T + 6.7 t - 0.022 t T - 0.0264 T^2 - 0.061 t^2$ | 0.76                          | 0.00027        |
| <b>Xylan solubilization</b>     | $-820 + 8.4 T + 0.46 t + 0.0041 t T - 0.0199 T^2 - 0.030 t^2$  | 0.95                          | 3.0e-07        |
| <b>Xylan removal</b>            | $-290 + 3.0 T + 3.3 t - 0.0076 t T - 0.0061 T^2 - 0.035 t^2$   | 0.89                          | 2.8e-05        |
| <b>Non-carbohydrate removal</b> | $-460 + 4.4 T + 4.6 t - 0.015 t T - 0.0097 T^2 - 0.019 t^2$    | 0.83                          | 0.00019        |
