# Supplementary material for: Integrated analysis of hydrothermal flow through pretreatment
Source: PubMed Central journal article supplement (PMC3495837; doi:10.1186/1754-6834-5-49), 2012-07-19
Supplement: 1754-6834-5-49-S3.pdf [file 1754-6834-5-49-S3.pdf]

Table S2. Compositional mass balances on pretreatment and SSF.

|          | time (min) | Temp (oC) | untreated |      |          | pretreated solids |      |          | hydrolyzate |      |          | SSF residue |      |
|----------|------------|-----------|-----------|------|----------|-------------------|------|----------|-------------|------|----------|-------------|------|
|          |            |           | glucan    | XMG  | arabinan | glucan            | XMG  | arabinan | glucan      | XMG  | arabinan | glucan      |      |
| Figure 1 | Wet poplar | 8.00      | 180.00    | 3.90 | 1.66     | 0.09              | 4.08 | 0.50     | 0.00        | 0.21 | 1.03     | 0.09        | 0.54 |
|          |            | 16.00     | 200.00    | 2.71 | 1.15     | 0.06              | 2.87 | 0.17     | 0.00        | 0.11 | 0.91     | 0.05        | 0.13 |
|          | Dry poplar | 8.00      | 180.00    | 4.70 | 2.00     | 0.11              | 4.07 | 0.70     | 0.00        | 0.39 | 1.24     | 0.12        | 0.46 |
|          |            | 16.00     | 200.00    | 4.70 | 2.00     | 0.11              | 4.13 | 0.23     | 0.00        | 0.41 | 1.66     | 0.12        | 0.11 |

|          |         | untreated |      |          | pretreated solids |      |          | hydrolyzate |      |          | SSF residue |      |
|----------|---------|-----------|------|----------|-------------------|------|----------|-------------|------|----------|-------------|------|
|          |         | glucan    | XMG  | arabinan | glucan            | XMG  | arabinan | glucan      | XMG  | arabinan | glucan      |      |
| Figure 2 | Batch   | CS        | 3.92 | 2.87     | 0.33              | 3.50 | 0.67     | 0.04        | 0.25 | 1.56     | 0.24        | 0.24 |
|          |         |           | 3.88 | 2.84     | 0.33              | 3.48 | 0.49     | 0.00        | 0.36 | 1.55     | 0.26        | 0.24 |
|          | Bagasse | 4.40      | 2.66 | 0.16     | 3.95              | 0.39 | 0.00     | 0.25        | 1.34 | 0.11     | 0.32        |      |
|          |         | 4.99      | 2.82 | 0.20     | 4.77              | 0.78 | 0.00     | 0.23        | 1.26 | 0.17     | 0.32        |      |
|          | Poplar  | 3.96      | 1.96 | 0.11     | 3.88              | 0.60 | 0.00     | 0.29        | 1.05 | 0.11     | 0.49        |      |
|          |         | 4.84      | 1.88 | 0.07     | 4.73              | 0.27 | 0.00     | 0.04        | 1.21 | 0.06     | 0.49        |      |
|          | FT      | CS        | 3.95 | 2.89     | 0.33              | 3.39 | 0.00     | 0.00        | 0.62 | 2.59     | 0.35        | 0.07 |
|          |         |           | 3.88 | 2.84     | 0.34              | 3.50 | 0.00     | 0.00        | 0.12 | 2.45     | 0.28        | 0.07 |
|          | Bagasse | 4.73      | 2.86 | 0.17     | 4.22              | 0.00 | 0.00     | 0.35        | 2.41 | 0.19     | 0.10        |      |
|          |         | 4.87      | 2.82 | 0.14     | 4.45              | 0.09 | 0.00     | 0.30        | 2.21 | 0.14     | 0.10        |      |
|          | Poplar  | 4.72      | 2.01 | 0.12     | 4.11              | 0.12 | 0.00     | 0.44        | 1.79 | 0.12     | 0.21        |      |
|          |         | 4.72      | 2.01 | 0.12     | 4.05              | 0.17 | 0.00     | 0.43        | 1.63 | 0.13     | 0.21        |      |

|          | time (min)  | Temp (oC) | untreated |      |          | pretreated solids |      |          | hydrolyzate |      |          | SSF residue |      |
|----------|-------------|-----------|-----------|------|----------|-------------------|------|----------|-------------|------|----------|-------------|------|
|          |             |           | glucan    | XMG  | arabinan | glucan            | XMG  | arabinan | glucan      | XMG  | arabinan | glucan      |      |
| Figure 3 | Corn Stover | 8.00      | 180.00    | 4.30 | 3.00     | 0.35              | 2.95 | 0.95     | 0.04        | 0.36 | 1.96     | 0.28        | 0.22 |
|          |             | 14.00     | 190.00    | 4.30 | 3.00     | 0.35              | 3.97 | 0.29     | 0.00        | 0.41 | 2.65     | 0.38        | 0.14 |
|          |             | 16.00     | 200.00    | 4.30 | 3.00     | 0.35              | 3.93 | 0.18     | 0.00        | 0.26 | 2.69     | 0.31        | 0.07 |
|          |             | 8.00      | 220.00    | 4.30 | 3.00     | 0.35              | 4.17 | 0.12     | 0.00        | 0.18 | 2.69     | 0.35        | 0.11 |
|          |             | 12.00     | 220.00    | 4.30 | 3.00     | 0.35              | 4.12 | 0.02     | 0.00        | 0.02 | 2.67     | 0.35        | 0.07 |
|          | Bagasse     | 24.00     | 225.00    | 4.30 | 3.00     | 0.35              | 4.14 | 0.00     | 0.00        | 0.00 | 2.77     | 0.37        | 0.30 |
|          |             | 8.00      | 180.00    | 4.69 | 2.74     | 0.17              | 1.71 | 0.96     | 0.04        | 0.64 | 1.80     | 0.07        | 0.60 |
|          |             | 12.00     | 190.00    | 4.69 | 2.74     | 0.17              | 3.77 | 0.42     | 0.00        | 0.72 | 2.21     | 0.11        | 0.37 |
|          |             | 20.00     | 200.00    | 4.69 | 2.74     | 0.17              | 4.48 | 0.19     | 0.00        | 0.33 | 2.44     | 0.11        | 0.14 |
|          |             | 16.00     | 210.00    | 4.69 | 2.74     | 0.17              | 4.62 | 0.00     | 0.00        | 0.00 | 2.35     | 0.12        | 0.11 |
| 12.00    | 220.00      | 4.69      | 2.74      | 0.17 | 4.55     | 0.00              | 0.00 | 0.00     | 2.32        | 0.11 | 0.10     |             |      |
| 22.00    | 223.00      | 4.69      | 2.74      | 0.17 | 4.30     | 0.00              | 0.00 | 0.00     | 2.00        | 0.12 | 0.13     |             |      |

|                        | time (min) | Temp (oC) | untreated |      |          | pretreated solids |      |          | hydrolyzate |      |          | SSF residue |
|------------------------|------------|-----------|-----------|------|----------|-------------------|------|----------|-------------|------|----------|-------------|
|                        |            |           | glucan    | XMG  | arabinan | glucan            | XMG  | arabinan | glucan      | XMG  | arabinan | glucan      |
| Figure 3 and 4. Poplar | 8.00       | 180.00    | 4.70      | 2.00 | 0.12     | 4.07              | 0.67 | 0.00     | 0.39        | 1.24 | 0.14     | 0.46        |
|                        | 16.00      | 180.00    | 4.70      | 2.00 | 0.12     | 4.20              | 0.38 | 0.00     | 0.37        | 1.31 | 0.14     | 0.43        |
|                        | 8.00       | 200.00    | 4.72      | 2.01 | 0.12     | 4.29              | 0.32 | 0.00     | 0.42        | 1.59 | 0.12     | 0.30        |
|                        | 16.00      | 195.00    | 4.99      | 2.12 | 0.13     | 4.90              | 0.30 | 0.00     | 0.18        | 1.73 | 0.14     | 0.23        |
|                        | 12.00      | 200.00    | 4.74      | 2.02 | 0.12     | 4.47              | 0.23 | 0.00     | 0.43        | 1.66 | 0.14     | 0.18        |
|                        | 12.00      | 200.00    | 4.72      | 2.01 | 0.12     | 4.04              | 0.22 | 0.00     | 0.41        | 1.70 | 0.13     | 0.18        |
|                        | 12.00      | 200.00    | 4.74      | 2.02 | 0.12     | 4.54              | 0.21 | 0.00     | 0.41        | 1.69 | 0.13     | 0.18        |
|                        | 16.00      | 200.00    | 4.70      | 2.00 | 0.12     | 4.13              | 0.26 | 0.00     | 0.41        | 1.66 | 0.14     | 0.11        |
|                        | 20.00      | 200.00    | 4.80      | 2.04 | 0.12     | 4.20              | 0.18 | 0.00     | 0.39        | 1.72 | 0.14     | 0.17        |
|                        | 16.00      | 205.00    | 4.99      | 2.12 | 0.13     | 4.70              | 0.19 | 0.00     | 0.22        | 1.80 | 0.13     | 0.22        |
|                        | 24.00      | 200.00    | 4.99      | 2.12 | 0.13     | 4.86              | 0.00 | 0.00     | 0.24        | 1.87 | 0.11     | 0.15        |
|                        | 28.00      | 200.00    | 5.00      | 2.13 | 0.13     | 4.94              | 0.20 | 0.00     | 0.20        | 1.97 | 0.11     | 0.26        |
|                        | 8.00       | 220.00    | 4.70      | 2.00 | 0.12     | 4.05              | 0.18 | 0.00     | 0.43        | 1.63 | 0.12     | 0.19        |
|                        | 16.00      | 210.00    | 4.83      | 2.06 | 0.12     | 4.79              | 0.13 | 0.00     | 0.42        | 1.94 | 0.12     | 0.14        |
|                        | 20.00      | 210.00    | 4.70      | 2.00 | 0.12     | 4.07              | 0.10 | 0.00     | 0.45        | 1.80 | 0.13     | 0.13        |
|                        | 24.00      | 210.00    | 5.03      | 2.14 | 0.13     | 4.81              | 0.00 | 0.00     | 0.24        | 1.87 | 0.09     | 0.17        |
|                        | 16.00      | 220.00    | 4.70      | 2.00 | 0.12     | 4.39              | 0.14 | 0.00     | 0.44        | 1.79 | 0.13     | 0.22        |
|                        | 20.00      | 220.00    | 4.99      | 2.12 | 0.13     | 4.83              | 0.00 | 0.00     | 0.22        | 1.84 | 0.10     | 0.23        |

|                                        | Time (hours) | Initial glucan (g) | Final glucan (g) |
|----------------------------------------|--------------|--------------------|------------------|
| FT pretreated poplar with ball milling | 24.00        | 0.25               | 0.15             |
|                                        | 48.00        | 0.25               | 0.09             |
|                                        | 96.00        | 0.25               | 0.03             |
| FT pretreated poplar, 10 FPU/g glucan  | 24.00        | 0.25               | 0.15             |
|                                        | 48.00        | 0.25               | 0.10             |
|                                        | 96.00        | 0.25               | 0.05             |
| Avicel                                 | 24.00        | 0.25               | 0.16             |
|                                        | 48.00        | 0.25               | 0.11             |
|                                        | 96.00        | 0.25               | 0.07             |
| FT pretreated poplar, 5 FPU/g glucan   | 24.00        | 0.25               | 0.20             |
|                                        | 48.00        | 0.25               | 0.16             |
|                                        | 96.00        | 0.25               | 0.10             |
